# Supplementary material
Source: Research Square preprint supplement (doi:10.21203/rs.3.rs-10235878/v1)
Supplement: Supplementary file 1 [file 8c7cd6d6e6357a9e71c994aa.docx]

# **APPENDIX B: EXAMPLE NSD — MIMIC-IV DEMO SEPSIS COHORT**

The following normative specification was used to govern the experiments reported in §6. It is reproduced in full for transparency.

use_case: Predict 24-hour Sepsis-3 onset in adult ICU patients to support escalation decisions by attending clinicians.

​

deployment_context: Adult medical-surgical ICU, tertiary care hospital setting. Patient population: 100 patients (140 ICU stays), sex distribution approximately 55% male (Group A) and 45% female (Group B), drawn from the MIMIC-IV Clinical Database Demo v2.2.

​

fairness_criterion: calibration

​

fairness_rationale: We choose calibration so that a predicted probability of 0.7 means the same clinical risk regardless of patient sex. This choice involves a trade-off: groups with lower sepsis base rates (female patients, 33.3%) will face a higher false-positive rate at the same operating threshold, at the cost of equal error burden. This trade-off was documented before model training began, consistent with the SVSP protocol.

​

acceptable_fnr: 0.15

acceptable_fpr: 0.25

​

stakeholders_represented:

- name: Clinical Lead

role: Attending Physician

consultation_date: 2026-06-01

consultation_method: structured interview

​

stakeholders_not_represented:

- name: Patient community

role: Patient Representative

exclusion_reason: Consultation planned for revision; current evaluation uses the MIMIC-IV Demo for proof-of-concept only. Patient community consultation will be conducted prior to any clinical deployment.

​

monitoring_frequency: monthly

validity_horizon: 2027-06-01

​

sunset_condition: Model retraining, change in Sepsis-3 diagnostic criteria [12], change in ICU admission protocols at deploying institution, or expiry of validity_horizon without NSD renewal.
