# Supplementary material
Source: Research Square preprint supplement (doi:10.21203/rs.3.rs-10235878/v1)
Supplement: Supplementary file 2 [file efa9422664d9aeef987bfb50.docx]

## Supplementary Materials

**stratum-eval: A Normative-First Evaluation Framework for Clinical Machine Learning**

Hassan Farooq | Sargodha Medical College, Sargodha, Punjab, Pakistan | hasanfarooq.edu@gmail.com

### S1 — TRIPOD-AI Reporting Checklist

**Reference:** Collins et al. (2024). TRIPOD+AI statement: updated guidance for reporting clinical prediction models that use regression or machine learning. *BMJ*, 385, e078378.

| **Item** | **Domain** | **Requirement** | **Status** | **Location in Manuscript** |
| --- | --- | --- | --- | --- |
| 1 | Title | Identify the study as developing, validating, or updating a clinical prediction model | ✓ | Title |
| 2 | Abstract | Provide a structured summary of objectives, methods, results, and conclusions | ✓ | Abstract |
| 3 | Abstract — model type | State the type of prediction model and intended use | ✓ | Abstract |
| 4 | Background | Explain the medical context and the clinical problem the model addresses | ✓ | §1.1 |
| 5 | Objectives | Specify the objectives, including the prediction target, population, and setting | ✓ | §1.3 |
| 6 | Source of data | Describe the source of data used in the study | ✓ | §6.1 |
| 7 | Study design | Define the study design | ✓ | §6.1 |
| 8 | Participants — eligibility | Specify eligibility criteria | ✓ | §6.1 |
| 9 | Participants — setting | Describe the care setting and time period | ✓ | §6.1, Appendix B |
| 10 | Outcome | Clearly define the outcome to be predicted | ✓ | §6.1 |
| 11 | Outcome — ascertainment | Describe how the outcome was measured | ✓ | §6.1 |
| 12 | Predictors — selection | Describe how predictors were selected | ✓ | §6.1 |
| 13 | Predictors — ascertainment | Describe how predictor values were measured and handled | ✓ | §6.1 |
| 14 | Sample size | Explain how the sample size was determined | Partial | §6.1 — constrained by the MIMIC-IV Demo's 100-patient restriction; not a power-based calculation. The study is a proof-of-concept demonstration of the stratum-eval framework, not a powered clinical validation study. |
| 15 | Missing data | Describe how missing data were handled | ✓ | §6.1 |
| 16 | Statistical analysis — preprocessing | Describe all preprocessing steps | ✓ | §6.1, S5 |
| 17 | Statistical analysis — model | Describe the modelling technique and software | ✓ | §6.2 |
| 18 | Statistical analysis — performance | Specify all measures used to assess model performance | ✓ | §4, §6.3 |
| 19 | Statistical analysis — validation | Describe the internal and external validation approach | Partial | §6.2 — five-fold stratified cross-validation on the training set is reported. External validation was not performed and is noted as a limitation (§7.2). |
| 20 | Model development — selection | Describe the process for developing the final model | ✓ | §6.2 |
| 21 | Model development — hyperparameters | Report all hyperparameters and selection strategy | ✓ | §6.2 |
| 22 | Participants — flow | Report the number of participants at each stage | ✓ | §6.1 |
| 23 | Predictors — descriptive | Give descriptive statistics for predictors and outcome | Partial | §6.1 — group-level prevalence is reported. Predictor-level descriptive statistics are available from the extraction pipeline (S5) but are not tabulated in the main manuscript to preserve focus on the evaluation framework. |
| 24 | Model performance | Report performance measures with confidence intervals | Partial | §6.3, Tables 2–4 — point estimates are reported. Bootstrap 95% confidence intervals on AUROC are provided in S2. |
| 25 | Model presentation | Present the model for individual predictions | N/A | Framework paper — the model is not presented for direct clinical deployment. |
| 26 | Limitations | Discuss limitations | ✓ | §7.2 |
| 27 | Interpretation | Discuss the implications in context of the evidence | ✓ | §7.3 |
| 28 | Generalisability | Discuss generalisability | ✓ | §7.2, §6.1 (limitation note) |
| 29 | Registration | State whether the study was registered | N/A | Observational secondary analysis of publicly available de-identified data; registration not required. |
| 30 | Funding | Give the source of funding | ✓ | Acknowledgements — no external funding. |
| 31 | Code availability | Report where the analysis code is available | ✓ | §9, Code Availability — https://github.com/hadbierox196/stratum-eval |

### S2 — Bootstrap Confidence Intervals on AUROC

**Background.** Group-level AUROC estimates in the main manuscript (Table 2) are based on n = 17 (Group A, Male) and n = 18 (Group B, Female) held-out test stays. At this sample size, point estimates carry substantial uncertainty. Bootstrap 95% confidence intervals are reported here for transparency.

**Method.** Two thousand bootstrap resamples were drawn with replacement from each group's held-out test set. AUROC was computed via the Mann-Whitney U statistic on each resample. Resamples yielding a single class were excluded (one resample excluded for Group B). The 2.5th and 97.5th percentiles of the bootstrap distribution define the 95% confidence interval. All computations used the score arrays from the stratum-eval analysis pipeline; code is available at https://github.com/hadbierox196/stratum-eval.

**Table S2.1. Bootstrap 95% confidence intervals on AUROC (n = 2,000 resamples, seed = 42).**

| **Group** | **n** | **AUROC (point estimate)** | **Bootstrap mean** | **95% CI** |
| --- | --- | --- | --- | --- |
| Group A (Male) | 17 | 0.829 | 0.829 | [0.569–1.000] |
| Group B (Female) | 18 | 0.961 | 0.961 | [0.833–1.000] |
| Overall (held-out test) | 35 | 0.905 | 0.903 | [0.790–0.981] |

**Interpretation.** The wide confidence intervals — particularly for Group A, whose lower bound extends to 0.569 — are an expected and honest consequence of the small per-group test set size (n = 17). This reinforces the manuscript's own framing: these estimates are proof-of-concept demonstrations of the stratum-eval framework's reporting architecture, not powered clinical validation estimates. The framework's Layer 4 underpowered-cell flagging and its validity horizon mechanism are both direct responses to exactly this kind of small-sample uncertainty.

### S3 — Full StratumCard Output (MIMIC-IV Demo Experiment)

The following is the machine-readable StratumCard produced by stratum-eval v0.1.0-dev for the MIMIC-IV Clinical Database Demo (v2.2) Sepsis-3 experiment reported in §6. Every field traces to either a section of this paper (paper_ref) or a location in the code repository (code_ref).

{
 "stratum_eval_version": "0.1.0-dev",
 "generated": "2026-06-30",
 "schema_version": "1.0",
 "nsd_status": "VALID",
 "nsd_validity_horizon": "2027-06-01",
 "nsd_expired": false,

 "use_case": "Predict 24-hour Sepsis-3 onset in adult ICU patients to support escalation decisions by attending clinicians.",

 "fairness_criterion": "calibration",
 "fairness_rationale_excerpt": "Calibration chosen so that a predicted probability of 0.7 reflects equal clinical risk regardless of patient sex. Trade-off acknowledged: groups with lower base rates face higher false-positive rates at the same operating threshold.",
 "trade_off_language_detected": true,

 "stakeholders_represented": [
 "Clinical Lead (Attending Physician)"
 ],
 "stakeholders_not_represented": [
 "Patient community — consultation planned for full MIMIC-IV deployment"
 ],

 "acceptable_fnr": 0.15,
 "acceptable_fpr": 0.25,
 "operating_threshold": 0.610,
 "threshold_selection_method": "Youden's J statistic",

 "validity_horizon": "2027-06-01",
 "sunset_condition": "Model retraining, change in Sepsis-3 diagnostic criteria (Singer et al., 2016), change in ICU admission protocols at deploying institution, or expiry of validity_horizon without NSD renewal.",
 "monitoring_frequency": "monthly",

 "dataset": {
 "name": "MIMIC-IV Clinical Database Demo",
 "version": "2.2",
 "license": "Open Data Commons Open Database License v1.0",
 "n_patients": 100,
 "n_icu_stays": 140,
 "outcome_prevalence_overall": 0.414,
 "outcome_prevalence_group_a": 0.481,
 "outcome_prevalence_group_b": 0.333,
 "train_n": 105,
 "test_n": 35,
 "test_n_group_a": 17,
 "test_n_group_b": 18
 },

 "model": {
 "type": "XGBoostClassifier",
 "api": "scikit-learn compatible",
 "hyperparameters": {
 "n_estimators": 300,
 "max_depth": 4,
 "learning_rate": 0.05,
 "subsample": 0.8,
 "colsample_bytree": 0.8
 },
 "features": [
 "heart_rate", "resp_rate", "sbp", "gcs_total",
 "creatinine", "platelets", "wbc", "age"
 ],
 "cross_validation": "5-fold stratified on training set",
 "cv_auroc_mean": 0.884,
 "cv_auroc_sd": 0.071,
 "cv_auroc_range": [0.765, 0.958]
 },

 "layer_results": {
 "layer_1_discriminative": {
 "auroc_overall": 0.905,
 "auroc_overall_95ci": [0.790, 0.981],
 "auroc_group_a": 0.829,
 "auroc_group_a_95ci": [0.569, 1.000],
 "auroc_group_b": 0.961,
 "auroc_group_b_95ci": [0.833, 1.000],
 "invariance_testable": false,
 "assumption_violations": [
 "single_environment: invariance untestable — only one deployment site available in MIMIC-IV Demo"
 ],
 "sci": null,
 "paper_ref": "§4.2, Table 2",
 "code_ref": "stratum/layers/layer1.py"
 },
 "layer_2_calibration": {
 "ece_group_a": 0.237,
 "ece_group_b": 0.110,
 "ece_difference": 0.127,
 "calibration_threshold_specified": false,
 "note": "No acceptable_ece field in NSD for this proof-of-concept run. ECE reported descriptively. Future NSD schemas should consider an explicit acceptable_ece field.",
 "paper_ref": "§4.3, Table 3, Figure 1",
 "code_ref": "stratum/layers/layer2.py"
 },
 "layer_3_group_fairness": {
 "group_col": "sex",
 "groups": {
 "A_Male": {
 "n": 17,
 "tp": 4,
 "fn": 3,
 "fp": 2,
 "tn": 8,
 "fnr": 0.429,
 "fpr": 0.200,
 "fnr_threshold": 0.15,
 "fpr_threshold": 0.25,
 "fnr_violation": true,
 "fpr_violation": false,
 "fnr_margin": 0.279
 },
 "B_Female": {
 "n": 18,
 "tp": 6,
 "fn": 1,
 "fp": 0,
 "tn": 11,
 "fnr": 0.143,
 "fpr": 0.000,
 "fnr_threshold": 0.15,
 "fpr_threshold": 0.25,
 "fnr_violation": false,
 "fpr_violation": false
 }
 },
 "nsd_violations": [
 "Group A (Male) FNR 0.429 exceeds acceptable_fnr 0.15 by margin 0.279"
 ],
 "action_required": "Stakeholder notification required per NSD protocol before any deployment decision.",
 "paper_ref": "§4.4, Table 4",
 "code_ref": "stratum/layers/layer3.py"
 },
 "layer_4_intersectional": {
 "group_cols": ["sex", "temporal_quartile"],
 "underpowered_threshold_n": 30,
 "all_cells_underpowered": true,
 "cells_suppressed": false,
 "cells_flagged": true,
 "note": "All intersectional cells n < 30 due to MIMIC-IV Demo cohort size restriction (100 patients). Point estimates withheld and replaced with underpowered marker. Rows remain visible in output.",
 "paper_ref": "§4.5, Table 5",
 "code_ref": "stratum/layers/layer4.py"
 },
 "layer_5_temporal": {
 "n_quartiles": 4,
 "quartile_n": [9, 9, 9, 8],
 "quartile_auroc": {
 "T1": 1.000,
 "T2": 1.000,
 "T3": 0.938,
 "T4": 0.714
 },
 "delta": 0.286,
 "interpretation": "Wide range consistent with n approximately 8-9 per quartile. Perfect AUROC in T1 and T2 consistent with near-complete class separation in small samples rather than genuine discriminative perfection. Interpret with caution.",
 "paper_ref": "§4.6, §6.3 Layer 5, Figure 4",
 "code_ref": "stratum/layers/layer5.py"
 }
 },

 "impossibility_analysis": {
 "base_rate_group_a": 0.481,
 "base_rate_group_b": 0.333,
 "base_rate_difference_pp": 14.8,
 "chouldechova_identity_applies": true,
 "jointly_acceptable_region_non_empty": true,
 "frontier_computed_pre_training": true,
 "nsd_violations_anticipated_pre_training": true,
 "paper_ref": "§3.5, §6.4, Figure 3"
 },

 "transparency_artefacts": {
 "stratumcard_format": ["JSON", "Markdown"],
 "regulatory_export_schema_version": "1.0",
 "paper_ref": "§5",
 "code_ref": "stratum/report.py"
 },

 "code": {
 "repository": "https://github.com/hadbierox196/stratum-eval",
 "license": "Apache 2.0",
 "version": "0.1.0-dev"
 }
 }

### S4 — Data Extraction Pipeline

The following pipeline constructs the Sepsis-3 cohort from the MIMIC-IV Clinical Database Demo (v2.2). All steps reproduce exactly from the publicly available data without PhysioNet credentialing.

**Step 1 — Load source tables.**

import pandas as pd
 import numpy as np

 # Adjust paths to your Kaggle/local mount
 patients = pd.read_csv("patients.csv.gz")
 admissions = pd.read_csv("admissions.csv.gz")
 icustays = pd.read_csv("icustays.csv.gz")
 chartevents = pd.read_csv("chartevents.csv.gz")
 labevents = pd.read_csv("labevents.csv.gz")
 prescriptions = pd.read_csv("prescriptions.csv.gz")

**Step 2 — Define Sepsis-3 outcome.**

Sepsis-3 is operationalised as co-occurrence of infection suspicion (at least one broad-spectrum antibiotic during the ICU stay) and organ dysfunction (creatinine > 1.2 mg/dL or GCS < 15 within the first 24 hours).

BROAD_SPECTRUM = [
 "piperacillin-tazobactam", "meropenem", "imipenem", "cefepime",
 "vancomycin", "metronidazole", "ciprofloxacin", "levofloxacin"
 ]

 abx = prescriptions[
 prescriptions["drug"].str.lower().str.contains(
 "|".join(BROAD_SPECTRUM), na=False)
 ][["hadm_id"]].drop_duplicates()
 abx["infection_suspicion"] = 1

**Step 3 — Extract vitals (first 24 hours of ICU stay).**

VITAL_ITEMS = {
 220045: "heart_rate",
 220210: "resp_rate",
 220179: "sbp",
 220739: "gcs_total"
 }

 vitals = chartevents[chartevents["itemid"].isin(VITAL_ITEMS)].copy()
 vitals["feature"] = vitals["itemid"].map(VITAL_ITEMS)
 vitals = vitals.merge(icustays[["stay_id", "intime"]], on="stay_id")
 vitals["hours_in"] = (
 pd.to_datetime(vitals["charttime"]) -
 pd.to_datetime(vitals["intime"])
 ).dt.total_seconds() / 3600
 vitals = vitals[vitals["hours_in"].between(0, 24)]

 vitals_agg = (vitals
 .groupby(["stay_id", "feature"])["valuenum"]
 .mean()
 .unstack("feature")
 .reset_index()
 )

**Step 4 — Extract labs (first 24 hours).**

LAB_ITEMS = {
 50912: "creatinine",
 51265: "platelets",
 51301: "wbc"
 }

 labs = labevents[labevents["itemid"].isin(LAB_ITEMS)].copy()
 labs["feature"] = labs["itemid"].map(LAB_ITEMS)
 labs = labs.merge(icustays[["hadm_id", "stay_id", "intime"]], on="hadm_id")
 labs["hours_in"] = (
 pd.to_datetime(labs["charttime"]) -
 pd.to_datetime(labs["intime"])
 ).dt.total_seconds() / 3600
 labs = labs[labs["hours_in"].between(0, 24)]

 labs_agg = (labs
 .groupby(["stay_id", "feature"])["valuenum"]
 .mean()
 .unstack("feature")
 .reset_index()
 )

**Step 5 — Merge, label, and split.**

cohort = (icustays
 .merge(patients[["subject_id", "anchor_age", "gender"]], on="subject_id")
 .merge(vitals_agg, on="stay_id", how="left")
 .merge(labs_agg, on="stay_id", how="left")
 .merge(abx, on="hadm_id", how="left")
 )
 cohort["infection_suspicion"] = cohort["infection_suspicion"].fillna(0)
 cohort["organ_dysfunction"] = (
 (cohort["creatinine"] > 1.2) | (cohort["gcs_total"] < 15)
 ).astype(int)
 cohort["sepsis3"] = (
 (cohort["infection_suspicion"] == 1) &
 (cohort["organ_dysfunction"] == 1)
 ).astype(int)
 cohort["age"] = cohort["anchor_age"]
 cohort["sex"] = cohort["gender"]

 FEATURES = ["heart_rate", "resp_rate", "sbp", "gcs_total",
 "creatinine", "platelets", "wbc", "age"]

 # Drop features with > 50% missingness
 for col in FEATURES[:]:
 if cohort[col].isna().mean() > 0.50:
 FEATURES.remove(col)
 print(f"Dropped {col}: >{50}% missing")

 # Median imputation on remaining features
 cohort[FEATURES] = cohort[FEATURES].fillna(cohort[FEATURES].median())

 from sklearn.model_selection import train_test_split
 X = cohort[FEATURES]
 y = cohort["sepsis3"]
 groups = cohort["sex"]

 X_train, X_test, y_train, y_test, g_train, g_test = train_test_split(
 X, y, groups, test_size=0.25, random_state=42, stratify=y
 )

 print(f"Train n={len(X_train)} | Test n={len(X_test)}")
 print(f"Overall prevalence: {y.mean():.3f}")
 print(f"Group A (Male) test: n={(g_test=='M').sum()}")
 print(f"Group B (Female) test: n={(g_test=='F').sum()}")

**Note on SOFA proxy.** The MIMIC-IV Demo does not include precomputed SOFA scores. The organ dysfunction criterion above uses a validated approximation (creatinine > 1.2 mg/dL or GCS < 15) consistent with published MIMIC-IV Sepsis-3 cohort construction approaches. Replication on the full MIMIC-IV dataset should use the complete SOFA score computed across all six organ subsystems.
